# Supplementary material for: Organoboronium-functionalized polystyrenes as a new class of polycations
Source: Royal Society of Chemistry journal article supplement (doi:10.1039/b902644d), 2009-01-01
Supplement: b902644d.pdf [file b902644d.pdf]

## **Electronic Supplementary Information**

# **Organoboronium-functionalized Polystyrenes as a New Class of Polycations**

Chengzhong Cui and Frieder Jäkle\*

Department of Chemistry, Rutgers University-Newark, 73 Warren Street, Newark, NJ 07102,  
USA

fjaekle@rutgers.edu

## Experimental Methods

**Materials and General Methods.** The compounds 2,2'-bipyridine (bipy),  $\text{NH}_4[\text{PF}_6]$ , and  $\text{BBr}_3$  were purchased from Acros. All chemicals were used as received without further purification. Poly(4-trimethylsilylstyrene),<sup>1</sup> 4-*t*-butylphenyltrimethylstannane,<sup>2</sup> and  $(\text{CuMes})_n$ <sup>3</sup> were prepared according to literature procedures. Reactions and manipulations involving reactive boron species were carried out under an atmosphere of prepurified nitrogen using either Schlenk techniques or an inert-atmosphere glove box (Innovative Technologies). Ether solvents were distilled from Na/benzophenone prior to use. Hydrocarbon and chlorinated solvents were purified using a solvent purification system (Innovative Technologies; alumina/copper columns for hydrocarbon solvents); chlorinated solvents and acetonitrile were distilled from  $\text{CaH}_2$  and degassed via several freeze-pump-thaw cycles.

The 499.9 MHz  $^1\text{H}$ , 125.7 MHz  $^{13}\text{C}$ , 470.4 MHz  $^{19}\text{F}$ , and 202.4 MHz  $^{31}\text{P}$  NMR spectra were recorded on a Varian INOVA 500 MHz spectrometer. The 160.4 MHz  $^{11}\text{B}$  NMR spectra were recorded with a boron-free probe using boron-free quartz NMR tubes.  $^1\text{H}$  and  $^{13}\text{C}$  NMR spectra were referenced internally to the solvent peaks,  $^{19}\text{F}$  NMR spectra were referenced externally to  $\alpha,\alpha',\alpha''$ -trifluorotoluene (0.05% in  $\text{C}_6\text{D}_6$ ;  $\delta = -63.73$ ), and the  $^{11}\text{B}$  NMR spectra externally to  $\text{BF}_3\cdot\text{Et}_2\text{O}$  ( $\delta = 0$ ) in  $\text{C}_6\text{D}_6$ . MALDI-TOF measurements were performed on an Applied Biosystems 4800 Proteomics Analyzer in reflectron (+)-mode with delayed extraction. Benzo[a]pyrene was used as the matrix (20 mg/mL in toluene) and the samples were dissolved in MeOH (10 mg/mL), mixed with the matrix in a 1:10 ratio, and then spotted on the wells of a sample plate. Peptides were used for calibration (Des-Arg-Bradykinin (904.4681), Angiotensin I (1296.6853), Glu-Fibrinopeptide B (1570.6774), ACTH (clip 1-17) (2093.0867), ACTH (clip 18-39) (2465.1989), ACTH (clip 7-38) (3657.9294) with  $\alpha$ -hydroxy-4-cyanocinnamic acid as the matrix. Elemental analyses were performed by Quantitative Technologies Inc. Whitehouse, NJ.

GPC analyses were performed in DMF / 20 mM  $\text{NH}_4[\text{PF}_6]$  (0.5 mL/min) using a Waters Breeze system equipped with a 717 plus auto sampler, a 1525 binary HPLC pump, a 2487 dual  $\lambda$  absorbance detector, and a 2414 refractive index detector. A series of Shodex Asahipak columns (GF-510 HQ, GF-310 HQ), which were kept in a column heater at 60 °C, were used for separation. The columns were calibrated with PS standards (Polymer Laboratories).

**Caution!**  $\text{BBr}_3$  is toxic and corrosive and should be handled appropriately with great care. Fluorinated grease was used for ground glass joints in reactions involving boron tribromide.

**Synthesis of poly(dipyridylmesitylstyrylboronium bromide) (P4-Mes).** A solution of poly(4-trimethylsilylstyrene) (**P1**) (1.00 g, 5.67 mmol  $\text{SiMe}_3$ ,  $M_n = 15390$ ,  $M_w = 17680$ ,  $PDI = 1.15$  based on GPC-UV) in  $\text{CH}_2\text{Cl}_2$  (30 mL) was added to a solution of  $\text{BBr}_3$  (1.71 g, 6.83 mmol) in  $\text{CH}_2\text{Cl}_2$  (20 mL) in a glove box. The reaction mixture was stirred at room temperature for 24 h. Copper mesityl (1.60 g, 8.76 mmol) in  $\text{CH}_2\text{Cl}_2$  (20 mL) was added, and the mixture was kept stirring for 12 h. A yellow-orange precipitate formed, which was removed by filtration through celite on a medium fritted funnel. A solution of 2,2'-dipyridyl (4.00 g, 25.6 mmol) in  $\text{CH}_2\text{Cl}_2$  (20 mL) was added drop-wise leading to a brownish suspension. After stirring for 12 h, the reaction mixture was poured into acetone (250 mL). The mixture was filtered to give an off-white solid, which was redissolved in methanol and dialyzed against methanol (Fisherbrand regenerated cellulose membrane with 6000 to 8000 Dalton molecular weight cut-off). The resulting solution was concentrated and precipitated into ether. The precipitate was collected on a filter paper and

dried under high vacuum at 60 °C for 12 h to give the product as a light yellow solid. Yield: 1.88 g (71%). <sup>1</sup>H NMR (499.884 MHz, DMSO-d<sub>6</sub>) δ = 9.1, 8.8, 8.2 (very br, 8H, bipy-H), 7.0-6.0 (very br, 6H, styryl-H, Mes-H<sub>3,5</sub>), 2.4-0.8 (br, 12H, *p*-Me, *o*-Me, backbone H). <sup>13</sup>C NMR (125.699 MHz, DMSO-d<sub>6</sub>) δ = 144.6 137.3, 133, 130.4, 126.7 (br, aromatic C), 26.1, 22.0, 20.5 (*p*-Me, *o*-Me), backbone C n.r.. <sup>11</sup>B NMR (160.386 MHz, methanol-d<sub>4</sub>) δ = 3.6 (w<sub>1/2</sub> = 300 Hz).

**Conversion to poly(dipyridylmesitylstyrylboronium hexafluorophosphate).** Poly(dipyridylmesitylstyrylboronium bromide) (0.35 g, 0.75 mmol boronium groups) in methanol (5 mL) was added into NH<sub>4</sub>[PF<sub>6</sub>] (0.36 g, 2.2 mmol) in H<sub>2</sub>O (100 mL). The resulting suspension was stirred for 1 h at room temperature. A white solid was collected on a filter paper and then washed extensively with water followed by hexanes. The product was dried under high vacuum at 60 °C. Yield: 0.31 g (77%). <sup>1</sup>H NMR (499.890 MHz, acetonitrile-d<sub>3</sub>) δ = 8.6, 7.9, 7.3, 6.7, 5.9 (v br, aromatic H), 2.2-1.0 (br, *p*-Me, *o*-Me, backbone). <sup>13</sup>C NMR (125.697 MHz, acetonitrile-d<sub>3</sub>) δ = 146.1, 144.9, 139.6, 134.2, 131.8, 130.5, 129.9, 125.0 (br, aromatic C), 46-40 (backbone C), 28-20 (v br, *p*-Me, *o*-Me). <sup>11</sup>B NMR (160.384 MHz, acetonitrile-d<sub>3</sub>) δ = 4.7 (w<sub>1/2</sub> = 520 Hz). <sup>19</sup>F NMR (470.367 MHz, acetonitrile-d<sub>3</sub>) δ = -72.6 (d, <sup>1</sup>J<sub>PF</sub> = 708 Hz, [PF<sub>6</sub>]<sup>-</sup>). <sup>31</sup>P NMR (202.394 MHz, DMSO-d<sub>6</sub>) δ = -144.2 (sept, <sup>1</sup>J<sub>PF</sub> = 709 Hz, [PF<sub>6</sub>]<sup>-</sup>). Elemental analysis for {C<sub>27</sub>H<sub>26</sub>BF<sub>6</sub>N<sub>2</sub>P}<sub>n</sub>: calcd C 60.70, H 4.90, N 5.24; found C 61.40, H 4.89, N 5.30%.

## SYNTHESIS OF MODEL COMPOUNDS

**Synthesis of dipyridyl(*t*-butylphenyl)(mesityl)boronium bromide (M4-Mes).** In a glove box, 4-dibromoboryl-1-*t*-butylbenzene (0.25 g, 0.82 mmol) in CH<sub>2</sub>Cl<sub>2</sub> (20 mL) was added to a solution of copper mesityl (1.66 g, 0.91 mmol) in CH<sub>2</sub>Cl<sub>2</sub> (20 mL), and the reaction mixture was stirred at room temperature for 1 h. An orange precipitate formed and the volume was reduced to ca. 2 mL. Hexanes (40 mL) were added and the mixture was stirred for 1 h. The solid was filtered off, and a colorless oil was obtained after evaporation of hexanes. The residue was redissolved in CH<sub>2</sub>Cl<sub>2</sub> (30 mL) and a solution of 2,2'-dipyridyl (0.32 g, 2.05 mmol) in CH<sub>2</sub>Cl<sub>2</sub> (10 mL) was added to give a clear yellow solution. After stirring for 1 h, the reaction mixture was concentrated and precipitated into hexanes to give a light yellow solid that was dried under high vacuum. Yield: 0.35 g (87%). <sup>1</sup>H NMR (499.896 MHz, DMSO-d<sub>6</sub>) δ = 9.30 (d, <sup>3</sup>J = 8.0 Hz, 2H, bipy-H<sub>3,3'</sub>), 9.20 (d, <sup>3</sup>J = 6.0 Hz, 2H, bipy-H<sub>6,6'</sub>), 8.86 (pst, <sup>3</sup>J = 8.0 Hz, 4H, bipy-H<sub>4,4'</sub>), 8.25 (pst, <sup>3</sup>J = 7.5 Hz, 2H, bipy-H<sub>5,5'</sub>), 7.20, 6.90 (2 x d, <sup>3</sup>J = 8.5 Hz, 2 x 2H, *t*BuPh-H<sub>2,6</sub> and *t*BuPh-H<sub>3,5</sub>), 6.77 (br s, 2H, mesityl-H<sub>3,5</sub>), 2.17 (s, 3H, *p*-Me), 1.48 (br s, 6H, *o*-Me), 1.17 (s, 9H, *t*-Bu). <sup>13</sup>C NMR (125.707 MHz, DMSO-d<sub>6</sub>) δ = 149.4 (*t*BuPh-C<sub>4</sub>), 145.1 (bipy-C<sub>4,4'</sub>), 144.9 (bipy-C<sub>2,2'</sub>), 144.3 (bipy-C<sub>6,6'</sub>), 144.1 (br, *t*BuPh-C<sub>1</sub>), 143.2 (br, Mes-C<sub>2,6</sub>), 137.3 (Mes-C<sub>4</sub>), 133.7 (br, Mes-C<sub>1</sub>), 130.4 (Mes-C<sub>3,5</sub>), 129.6 (bipy-C<sub>5,5'</sub>), 129.3, 125.1 (*t*BuPh-C<sub>2,6</sub> / *t*BuPh-C<sub>3,5</sub>), 124.2 (bipy-3,3'), 34.0 (Me<sub>3</sub>C), 31.0 (Me<sub>3</sub>C), 24.1 (br, *o*-Me), 20.3 (*p*-Me). <sup>11</sup>B NMR (160.386 MHz, DMSO-d<sub>6</sub>) δ = 8 (w<sub>1/2</sub> = 1520 Hz). MALDI-TOF MS (+ reflectron mode): m/z (Da) = 419.2555 (calcd for [C<sub>29</sub>H<sub>32</sub>BN<sub>2</sub>]<sup>+</sup> 419.2658).

**Synthesis of di(*t*-butylphenyl)dipyridylboronium bromide (M4-Ph).** Under nitrogen protection, a solution of 1-trimethylstannyl-4-*t*-butylbenzene (0.26 g, 0.88 mmol) in CH<sub>2</sub>Cl<sub>2</sub> (30 mL) was slowly added to a solution of 4-dibromoboryl-1-*t*-butylbenzene (0.25 g, 0.82 mmol) in CH<sub>2</sub>Cl<sub>2</sub> (30 mL). The reaction mixture was stirred for 2 h. The mixture was dried under high vacuum at room temperature. The white residue was redissolved in CH<sub>3</sub>CN (20 mL) and the resulting solution was added dropwise into a solution of 2,2'-dipyridyl (0.25 g, 1.60 mmol) in CH<sub>3</sub>CN (20 mL). A white precipitate formed immediately. After stirring for 1 h, the supernatant

was removed and the white crystalline residue was washed three times with cold acetonitrile (2 mL). A second crop of product was obtained from the supernatant and acetonitrile extracts upon concentration and precipitation into ether. The white solids were dried under high vacuum at 60 °C. Yield: 0.41 g (97%). <sup>1</sup>H NMR (499.895 MHz, DMSO-d<sub>6</sub>) δ = 9.20 (d, <sup>3</sup>J = 8.0 Hz, 2H, bipy-H3,3'), 9.09 (d, <sup>3</sup>J = 5.5 Hz, 2H, bipy-H6,6'), 8.79 (pst, <sup>3</sup>J = 7.7 Hz, 2H, bipy-H4,4'), 8.17 (pst, <sup>3</sup>J = 6.7 Hz, 2H, bipy-H5,5'), 7.32 (d, <sup>3</sup>J = 8.0 Hz, 4H, tBuPh-H2,6 / tBuPh-H3,5), 7.08 (d, <sup>3</sup>J = 8.0 Hz, 4H, tBuPh-H2,6 / tBuPh-H3,5), 1.24 (s, 18H, *t*-Bu). <sup>13</sup>C NMR (125.689 MHz, DMSO-d<sub>6</sub>) δ = 150.4 (tBuPh-C4), 145.5 (bipy-C2,2'), 145.0, 144.1 (bipy-C4,4',6,6'), 139.2 (tBuPh-C1), 132.4 (tBuPh-C2,6), 129.1 (bipy-C5,5'), 124.9 (Ph-C3,5), 123.7 (bipy-C3,3'), 34.2 (Me<sub>3</sub>C), 31.0 (Me<sub>3</sub>C). <sup>11</sup>B NMR (160.386 MHz, DMSO-d<sub>6</sub>) δ = 8 (w<sub>1/2</sub> = 1280 Hz). MALDI-TOF MS (+ reflectron mode): m/z (Da) = 433.2740 (calcd for [C<sub>30</sub>H<sub>34</sub>BN<sub>2</sub>]<sup>+</sup> 433.2815).

1. Y. Qin, G. Cheng, A. Sundararaman and F. Jäkle, *J. Am. Chem. Soc.*, 2002, **124**, 12672-12673; Y. Qin, G. Cheng, K. Parab, O. Achara and F. Jäkle, *Macromolecules*, 2004, **37**, 7123-7131.
2. Y. Qin, I. Kiburu, S. Shah and F. Jakle, *Org. Lett.*, 2006, **8**, 5227-5230.
3. H. Eriksson and M. Håkansson, *Organometallics*, 1997, **16**, 4243-4244; T. Tsuda, T. Yazawa, K. Watanabe, T. Fujii and T. Saegusa, *J. Org. Chem.*, 1981, **46**, 192-194; A. Sundararaman and F. Jäkle, *J. Organomet. Chem.*, 2003, **681**, 134-142.
